# Supplementary material
Source: publisher figshare collection journal article supplement (https://sage.figshare.com/ndownloader/files/17398589)
Supplement: Supplementary file 1 [file 17398589]

**Supplementary table 1** ICD 10th Revision Thai Modification (ICD-10-TM) codes for diseases included in the study

| ICD-10-TM code | Diseases of the respiratory system                 |
|----------------|----------------------------------------------------|
| J00            | Acute nasopharyngitis [common cold]                |
| J01            | Acute sinusitis                                    |
| J010           | Acute maxillary sinusitis                          |
| J011           | Acute frontal sinusitis                            |
| J012           | Acute frontal sinusitis                            |
| J013           | Acute frontal sinusitis                            |
| J014           | Acute frontal sinusitis                            |
| J018           | Acute frontal sinusitis                            |
| J019           | Acute frontal sinusitis                            |
| J02            | Acute pharyngitis                                  |
| J020           | Streptococcal pharyngitis                          |
| J028           | Acute pharyngitis due to other specified organisms |
| J029           | Acute pharyngitis, unspecified                     |
| J03            | Acute tonsillitis                                  |
| J030           | Streptococcal tonsillitis                          |
| J038           | Acute tonsillitis due to other specified organisms |
| J039           | Acute tonsillitis, unspecified                     |
| J04            | Acute laryngitis and tracheitis                    |
| J040           | Acute laryngitis                                   |
| J041           | Acute tracheitis                                   |

|      |                                                            |
|------|------------------------------------------------------------|
| J042 | Acute laryngotracheitis                                    |
| J05  | Acute obstructive laryngitis [croup] and epiglottitis      |
| J050 | Acute obstructive laryngitis [croup]                       |
| J051 | Acute epiglottitis                                         |
| J060 | Acute laryngopharyngitis                                   |
| J068 | Other acute upper respiratory infections of multiple sites |
| J069 | Acute upper respiratory infection, unspecified             |
| J20  | Acute bronchitis                                           |
| J200 | Acute bronchitis due to <i>Mycoplasma pneumoniae</i>       |
| J201 | Acute bronchitis due to <i>Haemophilus influenzae</i>      |
| J202 | Acute bronchitis due to <i>Haemophilus influenzae</i>      |
| J203 | Acute bronchitis due to coxsackievirus                     |
| J204 | Acute bronchitis due to parainfluenza virus                |
| J205 | Acute bronchitis due to respiratory syncytial virus        |
| J206 | Acute bronchitis due to rhinovirus                         |
| J207 | Acute bronchitis due to echovirus                          |
| J208 | Acute bronchitis due to other specified organisms          |
| J209 | Acute bronchitis, unspecified                              |
| J21  | Acute bronchiolitis                                        |
| J210 | Acute bronchiolitis due to respiratory syncytial virus     |
| J211 | Acute bronchiolitis due to human metapneumovirus           |
| J218 | Acute bronchiolitis due to other specified organisms       |
| J219 | Acute bronchiolitis, unspecified                           |

|      |                                                     |
|------|-----------------------------------------------------|
| J39  | Other diseases of upper respiratory tract           |
| J398 | Other specified diseases of upper respiratory tract |
| J399 | Disease of upper respiratory tract, unspecified     |

**Supplementary table 2** Diagnoses of diseases suspected to have a bacterial cause: criteria for diagnosis and recommended antibiotics

| Diagnosis                               | Criteria for diagnosis                                                                                                                                                                                                         | Recommended antibiotics                                                                                |
|-----------------------------------------|--------------------------------------------------------------------------------------------------------------------------------------------------------------------------------------------------------------------------------|--------------------------------------------------------------------------------------------------------|
| Acute tonsillitis/exudative tonsillitis | Three or more of these;<br>1. fever with severe sore throat<br>2. exudates at tonsils or marked erythematous swelling of uvula<br>3. tender cervical adenitis<br>4. no cough, runny nose, or conjunctivitis                    | penicillin, amoxicillin<br>cephalexin or clindamycin if allergic to penicillin                         |
| Acute otitis media                      | Otoscopic examination with one of these;<br>1. presence of purulent discharge<br>2. severe symptoms<br>3. fever with otalgia after having common cold for at least 3 days<br>4. aged < 2 years old<br>5. cannot be followed up | amoxicillin,<br>amoxicillin/clavulanic acid<br>cefuroxime or azithromycin<br>if allergic to penicillin |

|                          |                                                                                                                                                                                                                                                                                    |                                                                                                                  |
|--------------------------|------------------------------------------------------------------------------------------------------------------------------------------------------------------------------------------------------------------------------------------------------------------------------------|------------------------------------------------------------------------------------------------------------------|
| Bacterial rhinosinusitis | <p>One of these;</p> <ol style="list-style-type: none"> <li>1. rhinorrhea more than 10 days not attributable to allergy</li> <li>2. worsening of common cold after 3 days with new onset of fever or headache</li> <li>3. fever with facial pain or purulent nasal drip</li> </ol> | <p>amoxicillin,<br/>amoxicillin/clavulanic acid<br/>cefuroxime or azithromycin<br/>if allergic to penicillin</p> |
| Pertussis                | <p>Having cough for more than 2 weeks with history of contact cases of suspected pertussis and not attributable to asthma or allergies</p>                                                                                                                                         | <p>erythromycin or<br/>clarithromycin or<br/>azithromycin</p>                                                    |

**Supplementary table 3** Categorization of appropriate and inappropriate antibiotic prescription in this study

| Categories                                                                                               | Appropriate/Inappropriate |
|----------------------------------------------------------------------------------------------------------|---------------------------|
| 1. The visits of which antibiotics were not needed, and antibiotics were not prescribed                  | Appropriate               |
| 2. The visits of which antibiotics were needed, and antibiotics were prescribed                          | Appropriate               |
| 3. The visits of which antibiotics were not needed, but antibiotics were prescribed                      | Inappropriate             |
| 4. The visits of which antibiotics were needed, but antibiotics were not prescribed                      | Inappropriate             |
| 5. The visits of which antibiotics were needed, antibiotics were prescribed but with inappropriate drugs | Inappropriate             |
| 6. The visits of which antibiotics are needed, antibiotics were prescribed but inappropriate duration    | Inappropriate             |

**Supplementary table 4** Diagnoses of patients attended in the two study periods

| Diagnosis                                        | Pre- intervention<br>Total 2,553 visits<br>n (%) | Post- intervention<br>Total 2,935 visits<br>n (%) |
|--------------------------------------------------|--------------------------------------------------|---------------------------------------------------|
| Acute pharyngitis/ tonsillitis                   | 245 (9.6)                                        | 214 (7.3)                                         |
| Acute otitis media (AOM)                         | 80 (3.2)                                         | 112 (3.8)                                         |
| Acute bacterial rhino sinusitis                  | 46 (1.8)                                         | 61 (2.1)                                          |
| Common cold                                      | 1869 (73.2)                                      | 2193 (74.7)                                       |
| Acute bronchitis                                 | 296 (11.6)                                       | 327 (11.1)                                        |
| Acute bronchiolitis                              | 17 (0.6)                                         | 23 (0.8)                                          |
| AOM not response to initial treatment            | 0 (0)                                            | 4 (0.2)                                           |
| Rhinosinusitis not response to initial treatment | 0 (0)                                            | 1 (0)                                             |

Numbers in parentheses are percentages of the total number of visits for that disease in both the pre- or post-intervention periods.

**Supplementary table 5** Appropriateness of antibiotic prescription for each diagnosis

|                            | Appropriate  |           | Inappropriate |           |            |           |
|----------------------------|--------------|-----------|---------------|-----------|------------|-----------|
|                            | Category1    | Category2 | Category3     | Category4 | Category5  | Category6 |
| Pharyngotonsillitis        | 1 (0.4)      | 66 (27.0) | 69 (28.0)     | 5 (2.0)   | 104 (42.0) | 0 (0)     |
|                            | 0 (0)        | 65 (30.0) | 70 (33.0)     | 57 (27.0) | 21 (10.0)* | 1 (0.5)   |
| Acute otitis media         | 0 (0)        | 57 (71.0) | 14 (18.0)     | 3 (4.0)   | 6 (8.0)    | 0 (0)     |
|                            | 6 (5.4)      | 73 (65.0) | 13 (12.0)     | 14 (13.0) | 6 (5.0)    | 0 (0)     |
| Rhinosinusitis             | 0 (0)        | 36 (78.0) | 2 (4.0)       | 2 (4.0)   | 6 (13.0)   | 0 (0)     |
|                            | 0 (0)        | 43 (70.0) | 2 (3.0)       | 11 (18.0) | 3 (5.0)    | 2 (3.0)   |
| Common cold                | 1572 (84.0)  | 0 (0)     | 297 (16.0)    | 0 (0)     | 0 (0)      | 0 (0)     |
|                            | 2002 (91.0)* | 0 (0)     | 191 (9.0)     | 0 (0)     | 0 (0)      | 0 (0)     |
| Bronchitis                 | 225 (76.0)   | 6 (2.0)   | 65 (22.0)     | 0 (0)     | 0 (0)      | 0 (0)     |
|                            | 222 (68.0)   | 11 (3.0)  | 94 (29.0)     | 0 (0)     | 0 (0)      | 0 (0)     |
| Bronchiolitis              | 16 (94.0)    | 0 (0)     | 1 (6.0)       | 0 (0)     | 0 (0)      | 0 (0)     |
|                            | 23 (100.0)   | 0 (0)     | 0 (0)         | 0 (0)     | 0 (0)      | 0 (0)     |
| Acute otitis media<br>(NR) | 0 (0)        | 0 (0)     | 0 (0)         | 0 (0)     | 0 (0)      | 0 (0)     |
|                            | 0 (0)        | 3 (75)    | 0 (0)         | 0 (0)     | 1 (25)     | 0 (0)     |
| Rhinosinusitis (NR)        | 0 (0)        | 0 (0)     | 0 (0)         | 0 (0)     | 0 (0)      | 0 (0)     |
|                            | 0 (0)        | 1 (100)   | 0 (0)         | 0 (0)     | 0 (0)      | 0 (0)     |

The definition of each category is described in Supplementary table 3. Numbers represent the total number of cases and percentages are in parentheses. The first and second rows of each diagnosis



represent data in the pre- and post-intervention periods, respectively. NR: visits after not response to initial treatment. \* Statistically significant difference from the pre-intervention period at  $P < 0.05$ .
